# Supplementary material for: Sulfonyl passivation through synergistic hydrogen bonding and coordination interactions for efficient and stable perovskite solar cells
Source: Royal Society of Chemistry journal article supplement (doi:10.1039/d2ta02084j), 2022-01-01
Supplement: d2ta02084j1.pdf [file d2ta02084j1.pdf]

## Supporting Information

### **Sulfonyl passivation through synergistic hydrogen bonding and coordination interactions for efficient and stable perovskite solar cells**

Yangyang Hao,<sup>‡</sup> Xianzhao Wang,<sup>‡</sup> Mingzhe Zhu, Xiafei Jiang, Long Wang, Guorui Cao,<sup>\*</sup> Shuping Pang, and Zhongmin Zhou<sup>\*</sup>

## Experimental Section/Methods

### Materials

All chemicals were purchased from commercial suppliers and used without further processing. The lead (II) iodide ( $\text{PbI}_2$ , 99.99%, TCI), Cesium Iodide ( $\text{CsI}$ , >99.0%, TCI) and lead (II) bromide ( $\text{PbBr}_2$ , >98%, TCI) were purchased from Beijing Innochem Science & Technology co., LTD. The methylammonium bromide (MABr), methylamine chloride (MACl), and formamidinium iodide (FAI) were purchased from Xi'an Polymer Light Technology Corp. Super-dehydrated dimethylformamide (DMF, Acros), dimethyl sulfoxide (DMSO, Acros), ethyl ether (DE, Acros), chlorobenzene (CB, Acros), and isopropanol (IPA, Acros) were purchased from Beijing Innochem Science & Technology co., LTD.

### Device fabrication

The FTO conductive substrate glass that has been etched needs to be cleaned with alkaline cleaning solution, deionized water, acetone, and isopropanol in an ultrasonic cleaning machine for 20 minutes, successively. Then the cleaned substrate was treated in an  $\text{O}_2$  plasma cleaning machine for 5 min before use. A compact layer of  $\text{TiO}_2$  was deposited atop FTO by atomic layer deposition and then sintered at  $500^\circ\text{C}$  for 30 min in ambient air.  $\text{SnO}_2$  colloid precursor was synthesized by  $\text{SnCl}_4$  hydrolysis according to previously published work.<sup>[1]</sup>  $\text{SnO}_2$  electron transport layer was obtained by spin-coating on the FTO/ $\text{TiO}_2$  glass at 3000 rpm for 30 s, and then annealing for 30 min in an air atmosphere at  $180^\circ\text{C}$ . The perovskite solution was prepared by mixing 1.53 M  $\text{PbI}_2$ , 1.33 M FAI, 0.5 M MACl, 0.038 M MABr, 0.070 M CsI and 0.038 M  $\text{PbBr}_2$  in mixed DMF/DMSO solvent system (v:v = 9:1). The precursor solution was firstly spin-coated at 1000 rpm for 10 s, then at 4000 rpm for 30 s, and 300  $\mu\text{L}$  of the anti-solvent anisole was poured slowly at 20 s before the end of the second step. When preparing PSAD-treated devices, different concentrations of PSAD were pre-dissolved in the perovskite precursor solution. After the anti-solvent treatment, the devices were placed on a hot plate at  $100^\circ\text{C}$  annealing for 40 min. Later, 40  $\mu\text{L}$  of 1mg/mL PTABr was evenly spread on the surface of the perovskite film and was spin-coated at 4000 rpm for 20 s. The spiro-OMeTAD solution, containing 72.3 mg spiro-OMeTAD, 28.8  $\mu\text{L}$  4-

tert-butyl pyridine, and 17.5  $\mu\text{L}$  Li-TFSI solution (520 mg Li-TFSI in 1 mL ACN) in 1 mL CB, was deposited on the perovskite film at a speed of 4000 rpm for 20 s after the perovskite film cooling to room temperature. Finally, the high-purity gold particles were vapor-deposited onto the surface of the Spiro-OMeTAD at an evaporation rate of 0.1-0.7  $\text{\AA}/\text{s}$  using a vacuum evaporation apparatus, and the thickness of the gold electrode was 80 nm.

#### Characterization

Top-view scanning electron microscope (SEM) images were obtained with a field-emission scanning electron microscope (S-4800, Hitachi). XRD patterns were measured by Ultima IV of Rigaku with Cu  $K\alpha$  radiation (1.5406 $\text{\AA}$ ). Nuclear magnetic resonance (NMR) spectra were recorded on 400 MHz or 500 MHz Bruker AVANCE III 600 NMR spectrometer in  $\text{DMSO-}d_6$  or  $\text{CDCl}_3$ . Chemical shifts were reported in parts per million ( $\delta$ ) relative to tetramethylsilane (TMS). Fourier transform infrared (FTIR) spectroscopy characterization was performed by a Nicolet iS50 (Thermo Scientific) under purging with nitrogen gas. Silicon substrates were used for FTIR measurements. X-ray photoelectron spectroscopy (XPS) spectra analysis of films on ITO was performed in the air using a Thermo Fisher ESCALAB 250 Xi. Curve fitting was performed using the Thermo Advantage software. The curves were corrected based on the C1s peak at 284.8 eV. The UV-vis absorbance was measured by UV/Vis spectrometer (Ocean Optics). Steady PL was recorded on a fluorometer (Ocean Optics) excited at 460 nm. Time-resolved PL was determined with the single-photon counting technique using an Edinburgh F900 spectrometer with an excitation wavelength at 460 nm. An electrochemical workstation (CHI660E) was used to measure Mott-Schottky C-V curves and electrochemical impedance spectroscopy (EIS) curves in the dark. The TPV curves were obtained using a homemade laser pulse oscilloscope. The UPS equipped with He-I source ( $h\nu = 21.22$  eV) (AXIS ULTRA DLD, Kratos, UK) was used to determine the valence band energy and Fermi level. The Fermi level of the samples was referred to as that of Au which was in electrical contact with a sample in UPS measurements. The  $J$ - $V$  characteristics of the devices (voltage scanning rate 10 mV/30 ms) and the steady photocurrent under maximum power output bias were

recorded under AM 1.5G illumination at  $100 \text{ mW cm}^{-2}$  with a solar simulator (Sumitomo Heavy Industries Advanced Machinery) under ambient conditions.  $J$ - $V$  curves for all devices were measured by masking the devices with a metal mask with an aperture area of  $0.09 \text{ cm}^2$ . The light intensity of the solar simulator was calibrated with a standard silicon solar cell certified by the National Renewable Energy Laboratory. The EQE spectra were carried out using a Sciencetech SF150 xenon arc lamp and a PTI monochromator, with the monochromatic light intensity calibrated by a Si photodiode (Newport, 818-UV). All the measurements were carried out in an ambient atmosphere. Air Stability Test: Place all unsealed cells in a dry box at ambient with a relative humidity of  $< 10\%$ . Operational stability test: The MPP stability tests was performed using a stability setup (LC Auto-Test 24, Shenzhen Lancheng Technology Co., Ltd.). In the test, all PSCs were un-encapsulated, tested under continuous light illumination and maximum power point tracking (controlled and monitored to be  $15 \text{ }^\circ\text{C}$ ). The light source consisted of an array of white LEDs (MG-A200A-AE) powered by a constant current. Sun intensities were calibrated by a calibrated Si-reference cell. During aging, the devices were masked and placed in a holder purged with continuous  $\text{N}_2$  flow.  $J$ - $V$  curves with reverse voltage scans were recorded every 0.5 h during the whole operational test.

#### DFT calculations

The Structures were optimized under M06-2X/def2TZVP level by Gaussian 16 Rev A.03 and certified without any imaginary frequencies before calculations of complexation energy.<sup>[2]</sup> HOMO/LUMO information was derived from Multiwfn 3.8 dev bin Win64 and the molecular orbital isosurfaces were drawn by VMD 1.9.3.<sup>[3]</sup> The coordinates of atoms of doping molecule (PSAD), PSAD- $\text{FA}^+$ , and PSAD- $\text{Pb}^{2+}$  complexes were shown in Table S6-S8, respectively.

#### Synthetic details

Synthesis of 3-ethylbenzo[d]isothiazole 1,1-dioxide (PSAD)

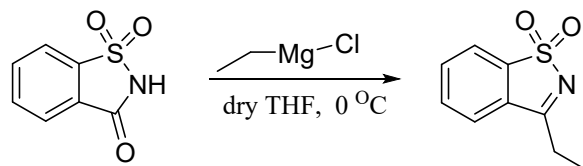

To a 100-mL three-necked flask, o-benzoylsulfonamide (10 mmol) was dissolved in 25 mL anhydrous tetrahydrofuran. The flask was placed in an ice bath to lower the temperature to 0 °C. Grignard reagent ethylmagnesium chloride (10 mL, 2 M) was added dropwise to the reaction system through a constant pressure dropping funnel, and the reaction temperature was gradually raised to room temperature and stirred overnight under argon protection. The reaction was quenched with saturated ammonium chloride solution, and extracted with ethyl acetate. The organic phases were combined, and dried over anhydrous sodium sulfate, then filtered with suction and rinsed the filter cake twice with ethyl acetate. The obtained filtrate was distilled under reduced pressure with a rotary evaporator to obtain a crude product, which was separated and purified by column chromatography (ethyl acetate : petroleum ether = 4:1) to obtain a white solid (1.54 g) with a yield of 78.9%.

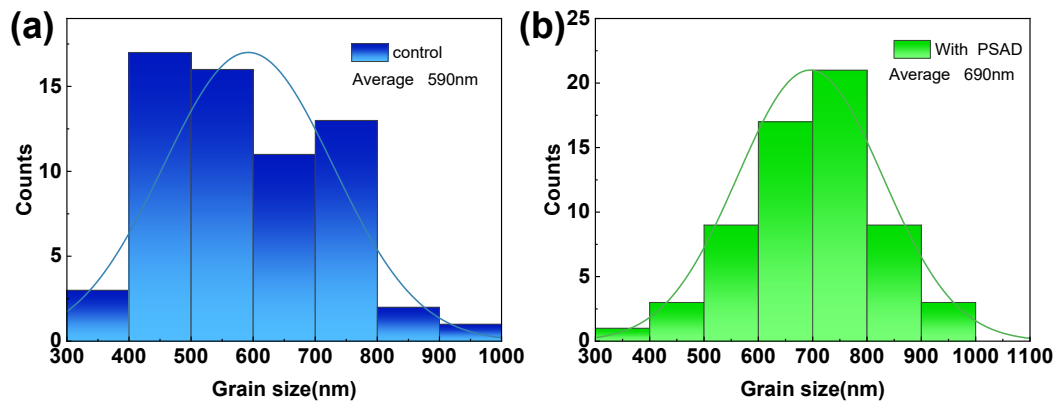

**Figure S1.** Statistics of grains size of perovskite films without (a) and with (b) PSAD treatment, respectively.

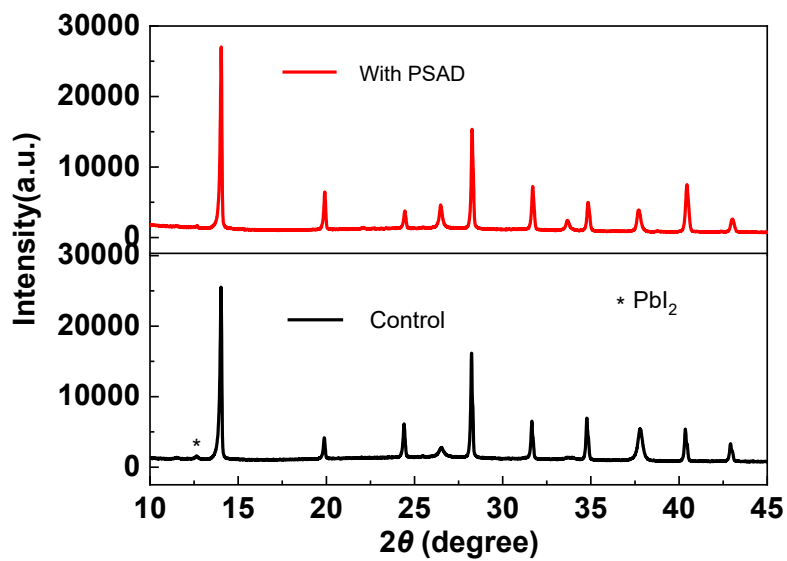

**Figure S2.** XRD patterns of the control film and perovskite film with PSAD.

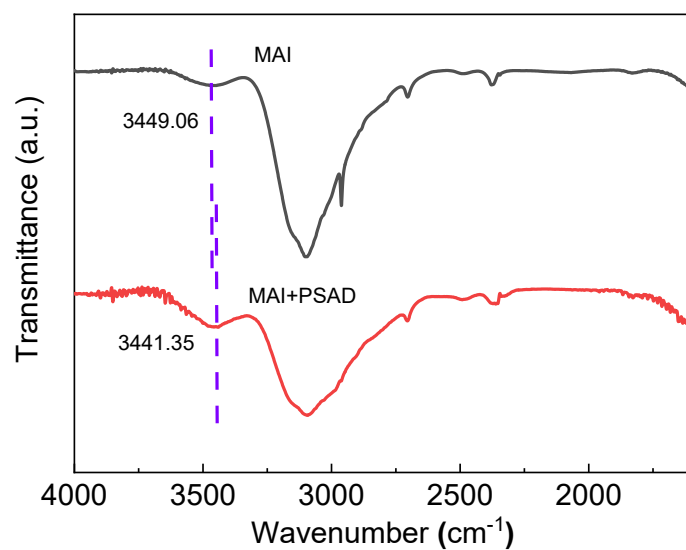

**Figure S3.** FTIR spectrum of MAI films with/without PSAD.

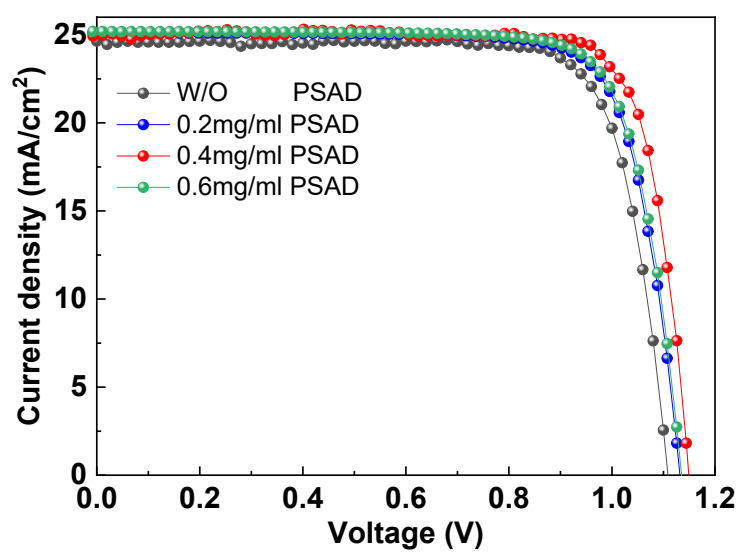

**Figure S4.**  $J$ - $V$  characteristics of optimal devices based on perovskite films with different concentrations of PSAD.

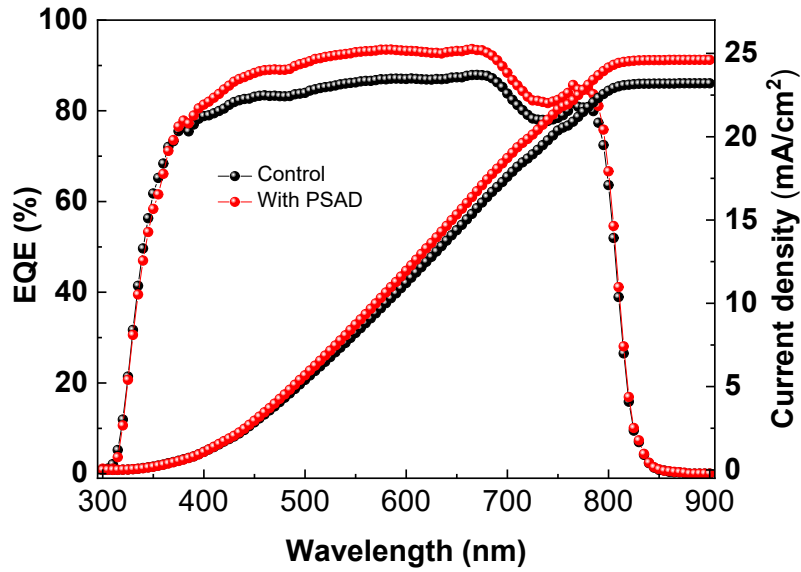

**Figure S5.** EQE spectrum of devices based on perovskite films with/without PSAD.

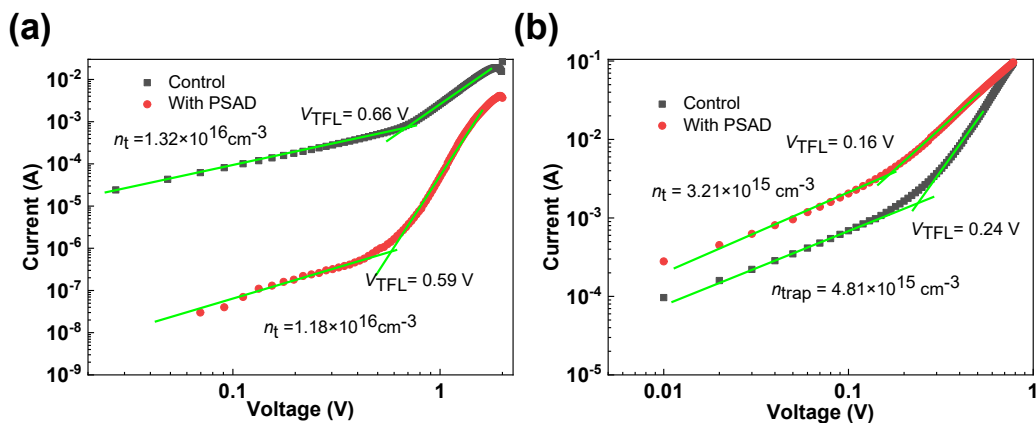

**Figure S6.** Dark current–voltage responses of electron-only (a) and hole-only (b) devices based on perovskite films with/without PSAD.



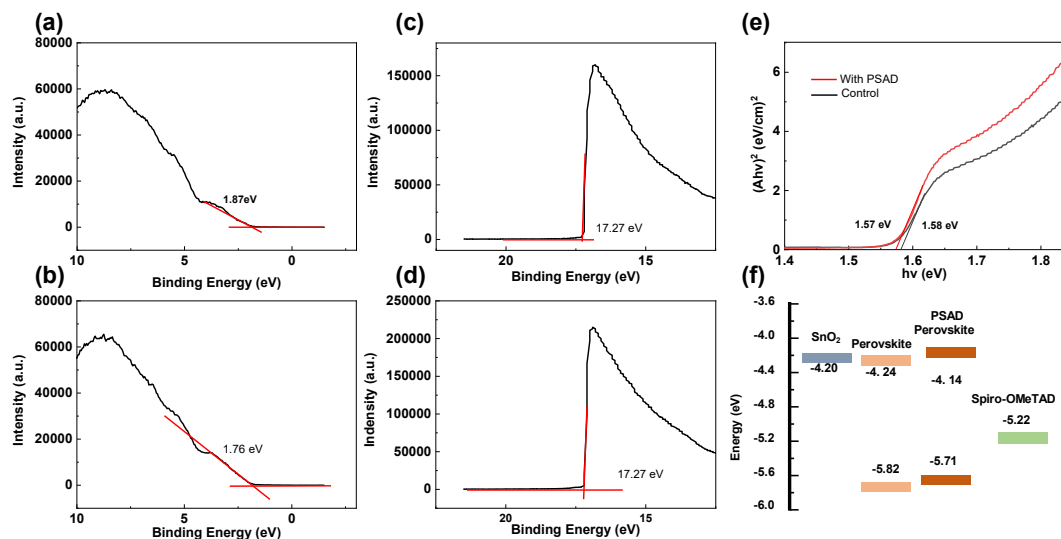

**Figure S7.** UPS spectra of the perovskite films without/with PSAD modification in the secondary-electron cut-off region (a) and (b), in Fermi edge region (c) and (d), respectively. (e) Energy-level diagram for the corresponding materials used in PSCs.

**Table S1.** Photovoltaic parameters of devices with different concentrations of PSAD.

| Sample        | $V_{oc}$ [V] | $J_{sc}$ [mA/cm <sup>2</sup> ] | FF    | PCE [%] |
|---------------|--------------|--------------------------------|-------|---------|
| W/O PSAD      | 1.108        | 24.62                          | 0.787 | 21.46   |
| 0.2mg/ml PSAD | 1.131        | 25.11                          | 0.784 | 22.29   |
| 0.4mg/ml PSAD | 1.153        | 25.33                          | 0.816 | 23.85   |
| 0.6mg/ml PSAD | 1.145        | 24.52                          | 0.788 | 22.13   |

**Table S2.** Photovoltaic parameters of devices with PSAD passivation.

| Sample    | $V_{oc}$ [V] | $J_{sc}$ [mA/cm <sup>2</sup> ] | FF    | PCE[%] |
|-----------|--------------|--------------------------------|-------|--------|
| With PSAD | 1.153        | 25.33                          | 0.816 | 23.85  |
|           | 1.143        | 25.15                          | 0.809 | 23.26  |
|           | 1.149        | 25.66                          | 0.780 | 22.98  |
|           | 1.151        | 25.82                          | 0.783 | 23.27  |
|           | 1.149        | 25.15                          | 0.783 | 22.60  |
|           | 1.146        | 25.19                          | 0.788 | 22.74  |
|           | 1.157        | 24.79                          | 0.791 | 22.70  |
|           | 1.154        | 24.79                          | 0.790 | 22.59  |
|           | 1.153        | 24.87                          | 0.787 | 22.58  |
|           | 1.148        | 25.01                          | 0.812 | 23.33  |
|           | 1.140        | 24.85                          | 0.793 | 22.45  |
|           | 1.142        | 25.26                          | 0.802 | 23.16  |
|           | 1.146        | 24.76                          | 0.789 | 22.39  |
|           | 1.153        | 25.22                          | 0.778 | 22.61  |
|           | 1.153        | 25.85                          | 0.747 | 22.25  |
|           | 1.151        | 25.52                          | 0.767 | 22.54  |
|           | 1.150        | 25.66                          | 0.780 | 23.02  |
|           | 1.153        | 25.41                          | 0.768 | 22.51  |
|           | 1.145        | 24.93                          | 0.775 | 22.10  |
|           | 1.151        | 24.57                          | 0.786 | 22.24  |

**Table S3.** Photovoltaic parameters of control devices.

| Sample  | $V_{oc}$ [V] | $J_{sc}$ [mA/cm <sup>2</sup> ] | FF    | PCE[%] |
|---------|--------------|--------------------------------|-------|--------|
| Control | 1.108        | 24.62                          | 0.786 | 21.46  |
|         | 1.096        | 23.91                          | 0.763 | 19.99  |
|         | 1.105        | 24.30                          | 0.767 | 20.60  |
|         | 1.104        | 24.48                          | 0.790 | 21.33  |
|         | 1.113        | 24.00                          | 0.790 | 21.09  |
|         | 1.115        | 24.10                          | 0.793 | 21.32  |
|         | 1.108        | 24.47                          | 0.758 | 20.56  |
|         | 1.094        | 24.78                          | 0.745 | 20.19  |
|         | 1.112        | 24.32                          | 0.755 | 20.41  |
|         | 1.107        | 23.25                          | 0.757 | 20.31  |
|         | 1.101        | 23.45                          | 0.757 | 19.55  |
|         | 1.091        | 24.25                          | 0.730 | 19.31  |
|         | 1.124        | 24.39                          | 0.770 | 21.12  |
|         | 1.121        | 24.50                          | 0.765 | 21.02  |
|         | 1.112        | 24.22                          | 0.791 | 21.30  |
|         | 1.121        | 24.42                          | 0.772 | 21.13  |
|         | 1.103        | 23.90                          | 0.791 | 20.86  |
|         | 1.121        | 23.97                          | 0.793 | 21.31  |
|         | 1.124        | 23.05                          | 0.797 | 20.65  |
|         | 1.126        | 24.11                          | 0.780 | 21.17  |

**Table S4.** Parameters of the TRPL spectroscopy of perovskite films with/without PSAD.

| Sample    | $\tau_{ave}$ (ns) | $\tau_1$ (ns) | $\tau_2$ (ns) | $A_1$ (ns) | $A_2$ (ns) |
|-----------|-------------------|---------------|---------------|------------|------------|
| Control   | 8.67              | 1.96          | 10.31         | 0.5621     | 0.4379     |
| With PSAD | 68.11             | 10.00         | 68.35         | 0.0274     | 0.9726     |

**Table S5.** Specific values of series resistance ( $R_s$ ), charge transport resistance ( $R_{ct}$ ) recombination resistance ( $R_{rec}$ ) of PSCs without and with PSAD.

| Sample    | $R_s$ ( $\Omega$ ) | $R_{ct}$ ( $\Omega$ ) | $CPE_1$    | $R_{rec}$ ( $\Omega$ ) | $CPE_2$    |
|-----------|--------------------|-----------------------|------------|------------------------|------------|
| Control   | 71.13              | 15277                 | 1.2007E-08 | 21797                  | 4.7244E-06 |
| With PSAD | 62.2               | 13810                 | 1.384E-08  | 28062                  | 2.5598E-06 |

**Table S6.** The Z-matrix and Cartesian coordinates of atoms of PSAD.

| Symbol | Bond/Å   | Angle/deg | Dihedral/deg | X/Å      | Y/Å      | Z/Å      |
|--------|----------|-----------|--------------|----------|----------|----------|
| C      |          |           |              | -1.0264  | -0.30778 | 0.00003  |
| C      | 1.382442 |           |              | -0.32927 | 0.886021 | -2.2E-05 |
| C      | 1.384522 | 120.1263  |              | -1.01295 | 2.089968 | -0.00002 |
| C      | 1.391315 | 118.1473  | -0.00174     | -2.40382 | 2.054925 | -2E-06   |
| C      | 1.39089  | 120.9467  | 0.00079      | -3.0888  | 0.844397 | 0.00003  |
| C      | 1.376384 | 122.7498  | 0.002238     | -2.40151 | -0.36702 | 0.00004  |
| C      | 1.492098 | 110.3846  | 180          | 1.140618 | 0.629526 | -1.7E-05 |
| H      | 1.082629 | 121.1904  | 179.9987     | -0.48446 | 3.034844 | -0.00004 |
| H      | 1.081831 | 119.6099  | -179.999     | -2.96186 | 2.981718 | -9E-06   |
| H      | 1.081944 | 119.5377  | -180         | -4.17074 | 0.843751 | 0.000036 |
| H      | 1.081738 | 121.414   | 179.9984     | -2.92507 | -1.31361 | 0.000055 |
| N      | 1.275622 | 116.578   | 0            | 1.506746 | -0.59242 | 0.00003  |
| C      | 1.493673 | 121.1147  | -179.998     | 2.120814 | 1.75659  | -2.1E-05 |
| H      | 1.095225 | 107.2413  | -56.4566     | 1.897714 | 2.380828 | -0.87184 |
| H      | 1.095222 | 107.243   | 56.45028     | 1.897661 | 2.380919 | 0.871717 |
| C      | 1.518898 | 113.9628  | 179.9972     | 3.572953 | 1.311231 | 0.000054 |
| H      | 1.088902 | 110.6954  | 59.54505     | 3.789505 | 0.70475  | -0.87801 |
| H      | 1.088918 | 110.3057  | 179.9997     | 4.233671 | 2.176791 | 0.000042 |
| H      | 1.088902 | 110.6952  | -59.5459     | 3.789434 | 0.704829 | 0.878189 |
| S      | 1.683041 | 110.8699  | 0.002958     | 0.172385 | -1.61815 | -6E-06   |
| O      | 1.426235 | 108.8238  | 113.6353     | 0.137433 | -2.32773 | -1.2367  |
| O      | 1.426236 | 108.8253  | -113.645     | 0.137422 | -2.32786 | 1.236618 |

**Table S7.** The Z-matrix and Cartesian coordinates of atoms of the ideal PSAD- FA<sup>+</sup> complex.

| Symbol | Bond/Å   | Angle/deg | Dihedral/deg | X/Å      | Y/Å      | Z/Å      |
|--------|----------|-----------|--------------|----------|----------|----------|
| C      |          |           |              | 0.981103 | -1.037   | -1.6E-05 |
| C      | 1.385376 |           |              | 1.993349 | -0.09115 | 0.000001 |
| C      | 1.382724 | 119.8315  |              | 3.314871 | -0.49797 | 0.000013 |
| C      | 1.392841 | 118.0345  | 0            | 3.578821 | -1.86557 | 0.000009 |
| C      | 1.390145 | 121.1887  | 0            | 2.547572 | -2.79779 | -7E-06   |
| C      | 1.375424 | 123.3166  | 0            | 1.213822 | -2.39259 | -2.1E-05 |
| C      | 1.491667 | 110.7159  | -180         | 1.426317 | 1.288541 | 0.000011 |
| H      | 1.082257 | 121.2937  | -180         | 4.124235 | 0.220507 | 0.000027 |
| H      | 1.081601 | 119.4676  | -180         | 4.604266 | -2.20955 | 0.00002  |
| H      | 1.08158  | 119.5748  | -180         | 2.782365 | -3.85358 | -9E-06   |
| H      | 1.081455 | 121.9647  | 180          | 0.406441 | -3.11209 | -3.3E-05 |
| N      | 1.284203 | 116.1618  | 0            | 0.144967 | 1.374095 | 0.000006 |
| C      | 1.487642 | 121.6186  | -180         | 2.301559 | 2.491466 | 0.000028 |
| H      | 1.095736 | 106.8496  | -56.1113     | 2.961239 | 2.404259 | 0.870576 |
| H      | 1.095735 | 106.8498  | 56.10956     | 2.961272 | 2.404263 | -0.87049 |
| C      | 1.518695 | 114.467   | 179.9992     | 1.553867 | 3.813355 | 0.000018 |
| H      | 1.088839 | 110.838   | 59.91241     | 0.919115 | 3.899326 | 0.880512 |
| H      | 1.088026 | 110.0075  | -180         | 2.260468 | 4.64071  | 0.000028 |
| H      | 1.08884  | 110.8378  | -59.9121     | 0.919141 | 3.899325 | -0.8805  |
| S      | 1.655143 | 110.3302  | -0.00027     | -0.5322  | -0.13618 | -1.8E-05 |
| O      | 1.441728 | 109.5132  | 116.1997     | -1.27669 | -0.33016 | 1.219283 |
| O      | 1.441729 | 109.5131  | -116.199     | -1.27667 | -0.33013 | -1.21934 |
| C      | 3.668008 | 101.4056  | 106.9563     | -4.73034 | -0.13034 | 0.00001  |
| H      | 1.08415  | 160.5841  | -169.638     | -5.81241 | -0.06319 | 0.000001 |
| N      | 1.304388 | 81.66444  | 9.760851     | -4.12416 | -0.16815 | -1.15435 |
| H      | 1.025686 | 122.4092  | -0.02191     | -3.1036  | -0.22775 | -1.23766 |
| H      | 1.007409 | 119.3964  | -179.559     | -4.66941 | -0.13114 | -2.00064 |
| N      | 1.304389 | 42.83559  | -170.545     | -4.12419 | -0.16828 | 1.15438  |
| H      | 1.007411 | 119.3969  | 179.4442     | -4.66945 | -0.13137 | 2.000666 |
| H      | 1.025682 | 122.4082  | -0.09156     | -3.10363 | -0.22787 | 1.237684 |

**Table S8.** The Z-matrix and Cartesian coordinates of atoms of the ideal PSAD- Pb<sup>2+</sup> complex.

| Symbol | Bond/Å   | Angle/deg | Dihedral/deg | X/Å      | Y/Å      | Z/Å      |
|--------|----------|-----------|--------------|----------|----------|----------|
| C      |          |           |              | -1.83234 | -1.0473  | 0.000355 |
| C      | 1.396932 |           |              | -2.92837 | -0.18119 | -0.00024 |
| C      | 1.378219 | 119.2734  |              | -4.20251 | -0.7066  | -0.00081 |
| C      | 1.399633 | 118.0199  | 0            | -4.33934 | -2.09953 | -0.00077 |
| C      | 1.388554 | 121.569   | 0.001509     | -3.23301 | -2.93865 | -0.00014 |
| C      | 1.376747 | 124.0105  | -0.00269     | -1.93573 | -2.42016 | 0.00047  |
| C      | 1.488583 | 111.3309  | 179.9936     | -2.4935  | 1.242457 | -5.9E-05 |
| H      | 1.082581 | 121.4259  | 179.999      | -5.0765  | -0.06776 | -0.00127 |
| H      | 1.082225 | 119.1772  | 179.9997     | -5.3313  | -2.53222 | -0.0012  |
| H      | 1.081829 | 119.7344  | 179.9983     | -3.37318 | -4.01136 | -0.00009 |
| H      | 1.081603 | 122.8741  | -179.996     | -1.07398 | -3.07381 | 0.000999 |
| N      | 1.307641 | 115.1863  | 0.003928     | -1.19922 | 1.42897  | 0.000528 |
| C      | 1.473887 | 123.0493  | -179.994     | -3.4402  | 2.372103 | -0.00046 |
| H      | 1.098915 | 106.1277  | -55.2425     | -4.09717 | 2.21949  | -0.86805 |
| H      | 1.098914 | 106.1276  | 55.23398     | -4.09801 | 2.219409 | 0.866473 |
| C      | 1.518716 | 115.5182  | 179.9953     | -2.80998 | 3.753888 | -8.5E-05 |
| H      | 1.0888   | 111.0409  | 60.49772     | -2.19202 | 3.90194  | -0.88421 |
| H      | 1.087329 | 109.4584  | -179.999     | -3.59247 | 4.508875 | -0.00041 |
| H      | 1.088801 | 111.0402  | -60.4962     | -2.19286 | 3.901827 | 0.884655 |
| S      | 1.604489 | 109.3905  | -0.00568     | -0.4561  | 0.006946 | 0.001031 |
| O      | 1.489239 | 111.0114  | 122.6041     | 0.455663 | -0.11949 | -1.16967 |
| O      | 1.488961 | 111.0307  | -122.639     | 0.455153 | -0.11934 | 1.171789 |
| Pb     | 2.332515 | 97.59888  | 110.3788     | 2.472231 | -0.03805 | -0.00029 |

## Reference

- [1] Z. Li, L. Wang, R. Liu, Y. Fan, H. Meng, Z. Shao, G. Cui, S. Pang, *Adv. Energy Mater.* 2019, **9**, 1902142.
- [2] Frisch, M. J.; Trucks, G. W.; Schlegel, H. B. et al. *Gaussian 09, Revision A.02*, Gaussian Inc., Wallingford CT, 2016.
- [3] T. Lu, F. Chen, *J. Comput. Chem.* 2012, **33**, 580–592.
